# Supplementary material for: Preparation and Performance Study of Photoconductive Detector Based on Bi2O2Se Film
Source: MDPI journal article supplement (doi:10.3390/photonics10111187), 2023-10-25
Supplement: s1 [file s1]

# Preparation and performance study of photoconductive detector based on $\text{Bi}_2\text{O}_2\text{Se}$ film

Jun Liu, Zhonghui Han, Jianning Ding, Kang Guo, Xiaobin Yang, Peng Hu, Haibo Fan, Feng Teng\*

School of Physics, Northwest University, Xi'an 710127, China

\*Corresponding author: tengfeng@nwu.edu.cn.

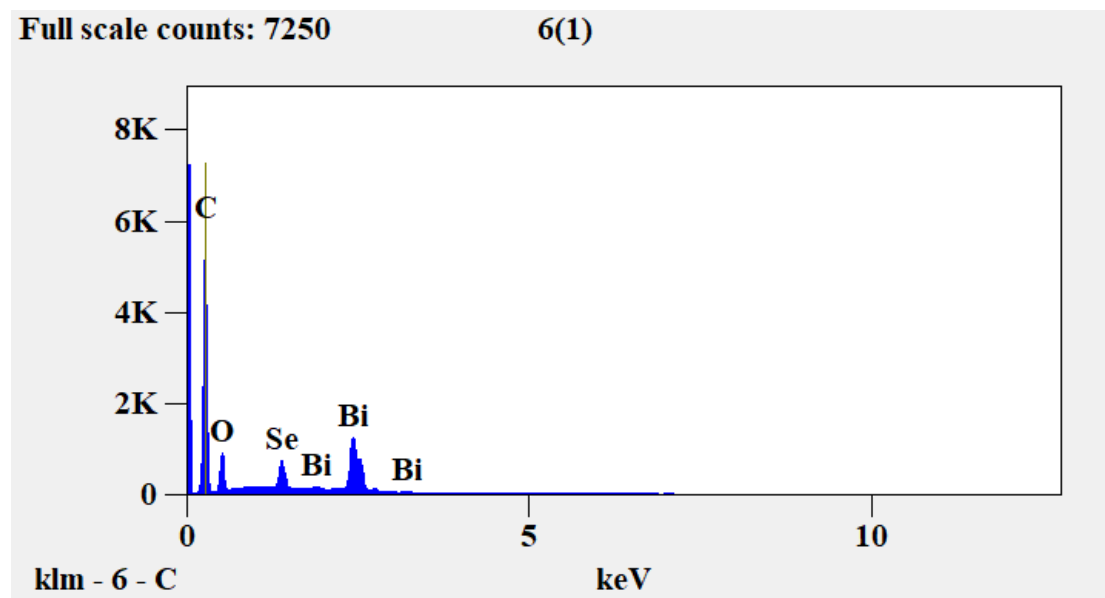

Figure S1. The EDX spectra show the stoichiometric ratio of  $\text{Bi}_2\text{O}_2\text{Se}$  sample.

Table S1. The quantitative results for Bi<sub>2</sub>O<sub>2</sub>Se sample.

| <i>Element</i> | <i>Weight %</i> | <i>Weight %</i> | <i>Atom %</i> | <i>Atom %</i> |
|----------------|-----------------|-----------------|---------------|---------------|
| <i>Line</i>    |                 | <i>Error</i>    |               | <i>Error</i>  |
| <i>C K</i>     | 21.77           | ± 0.14          | 64.93         | ± 0.41        |
| <i>O K</i>     | 9.24            | ± 0.21          | 20.69         | ± 0.46        |
| <i>Se L</i>    | 9.02            | ± 0.24          | 4.09          | ± 0.11        |
| <i>Bi M</i>    | 59.97           | ± 0.88          | 10.28         | ± 0.15        |
| <i>Total</i>   | 100.00          |                 | 100.00        |               |

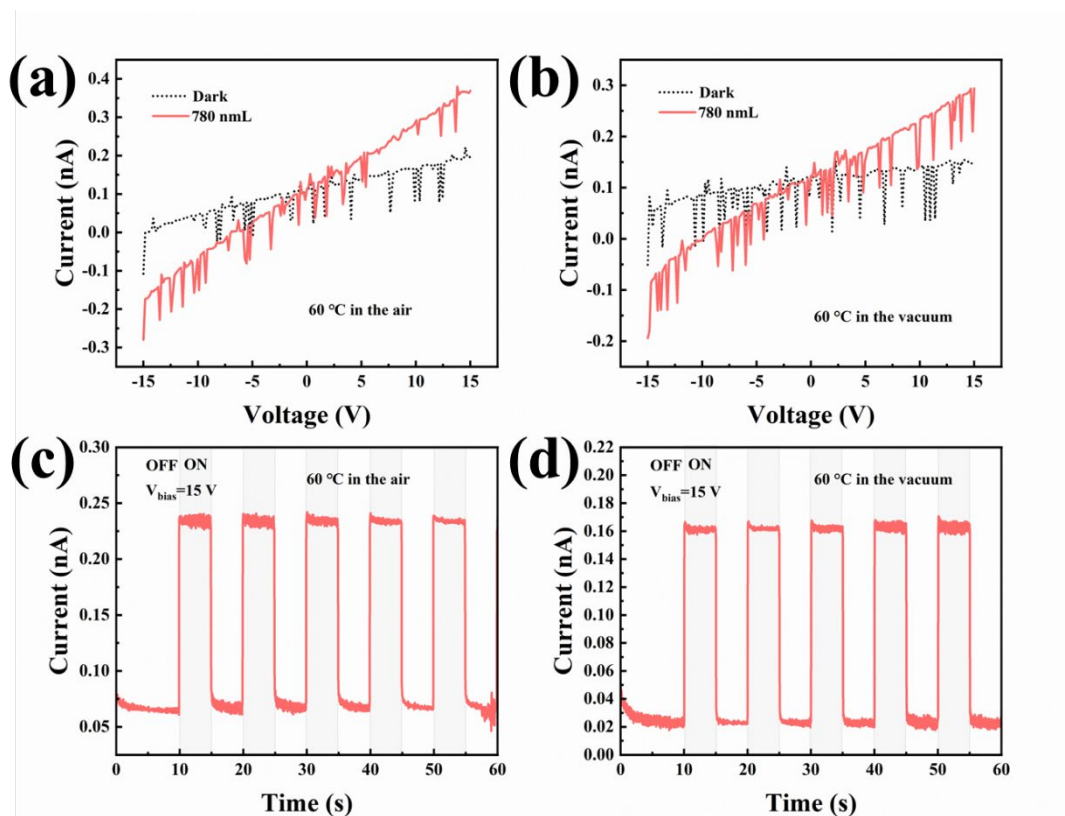

Figure S2. The performance comparison of the photodetectors based on the Bi<sub>2</sub>O<sub>2</sub>Se film dried at 60 °C, (a, c) in air and (b, d) in vacuum.
